# Supplementary material for: Tuning the annealing temperature to achieve heterostructured nanofibers for high performance lithium-ion batteries
Source: Royal Society of Chemistry journal article supplement (doi:10.1039/d2nj05331d), 2022-11-16
Supplement: d2nj05331d1.pdf [file d2nj05331d1.pdf]

## Tuning heterostructure in nanofibers by annealing temperature for high performance lithium-ion batteries

Shijin Yu<sup>a</sup>, Jiahao Tong<sup>a</sup>, Ying Wei<sup>a,b</sup>, Tianrui Chen<sup>a,b</sup>, Xuannan He<sup>a,b</sup>, Huiqiang Sui<sup>a</sup>, Cuiyun Li<sup>b</sup>, Hua Zhu<sup>a\*</sup>,  
Qiuyun Fu<sup>b\*</sup>, LingBing Kong<sup>c\*</sup>

<sup>a</sup> School of Mechanical and Electrical Engineering, Jingdezhen Ceramic University, Jingdezhen 333001, Jiangxi, China

<sup>b</sup> School of Optical and Electronic Information, Engineering Research Center for Functional Ceramics of the Ministry of Education, Huazhong University of Science and Technology, Wuhan, 430074, Hubei, China

<sup>c</sup> College of New Materials and New Energies, Shenzhen Technology University, Shenzhen 518118, Guangdong, China

\* Corresponding author: [zwchua@163.com](mailto:zwchua@163.com) (H. Zhu), [fuqy@hust.edu.cn](mailto:fuqy@hust.edu.cn) (Q. Fu), [lbkongntunus@126.com](mailto:lbkongntunus@126.com) (L. B. Kong)

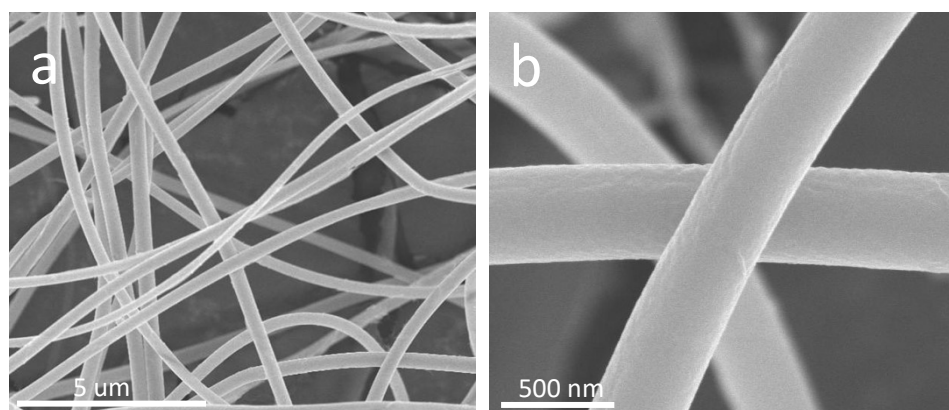

Fig.S1 SEM images of the as-spun Ni/Co compound nanofibers: (a) low magnification and (b) high magnification.

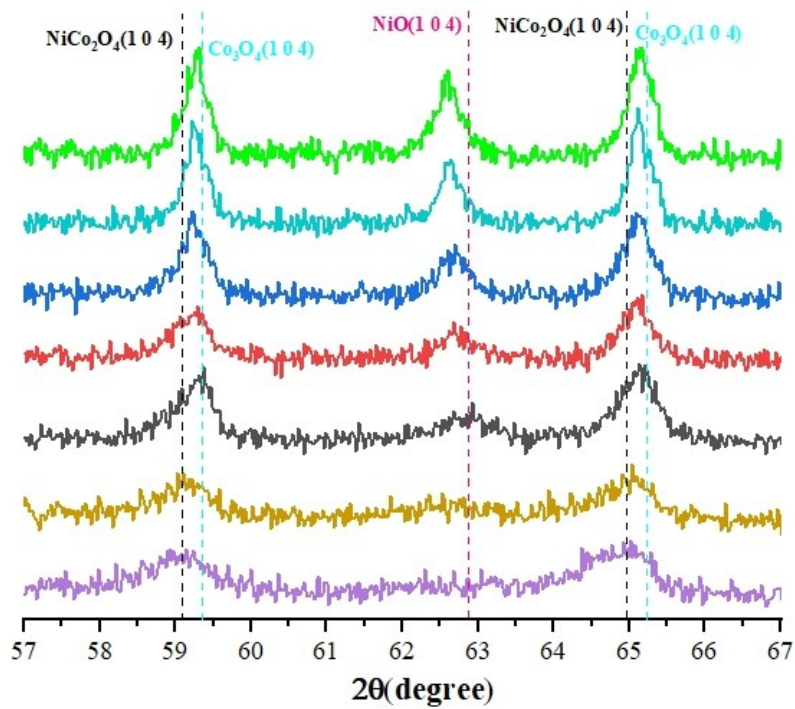

Fig.S2 Zoom-in XRD patterns ( $57^\circ$ – $67^\circ$ ) of the nanofiber annealed at different temperatures. The standard Bragg positions for NiO,  $\text{Co}_3\text{O}_4$  and  $\text{NiCo}_2\text{O}_4$  are marked.

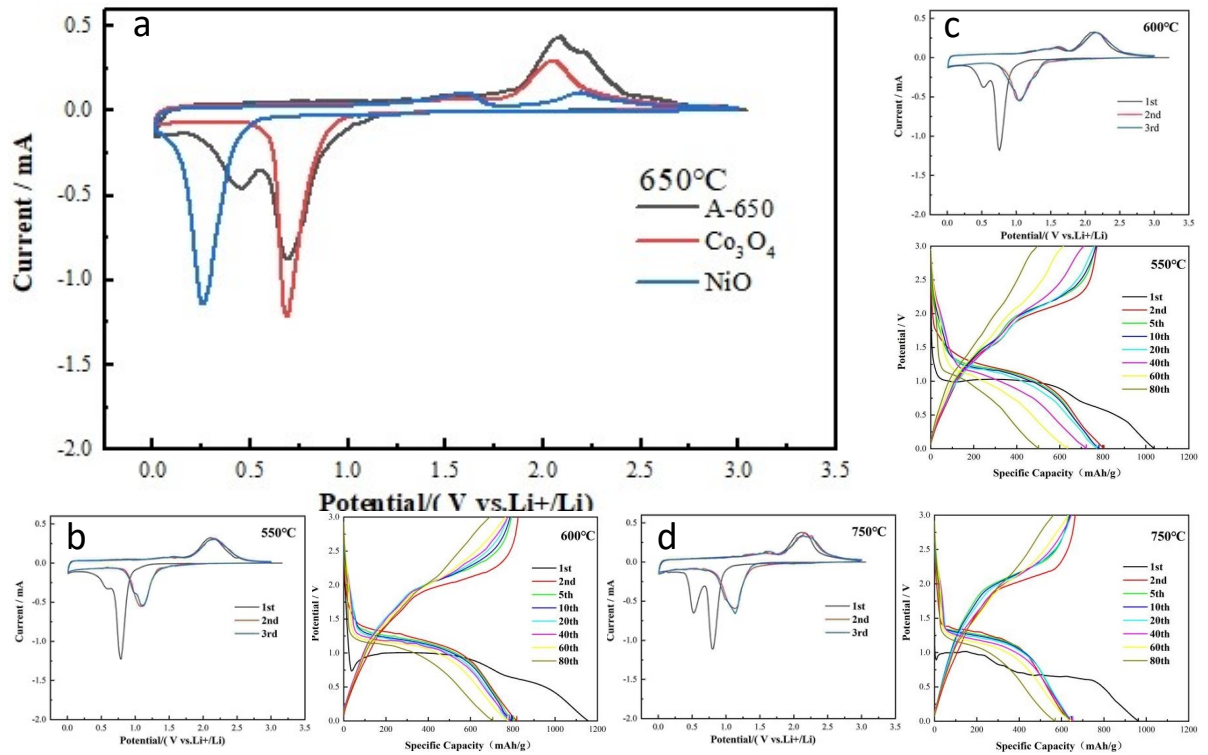

Fig.S3 (a) CV curves of A-650 sample,  $\text{Co}_3\text{O}_4$  and NiO nanofiber electrodes. CV curves and charge-discharge curves of A-550 (b), A-600 (c) and A-750 (d) nanofiber electrodes.

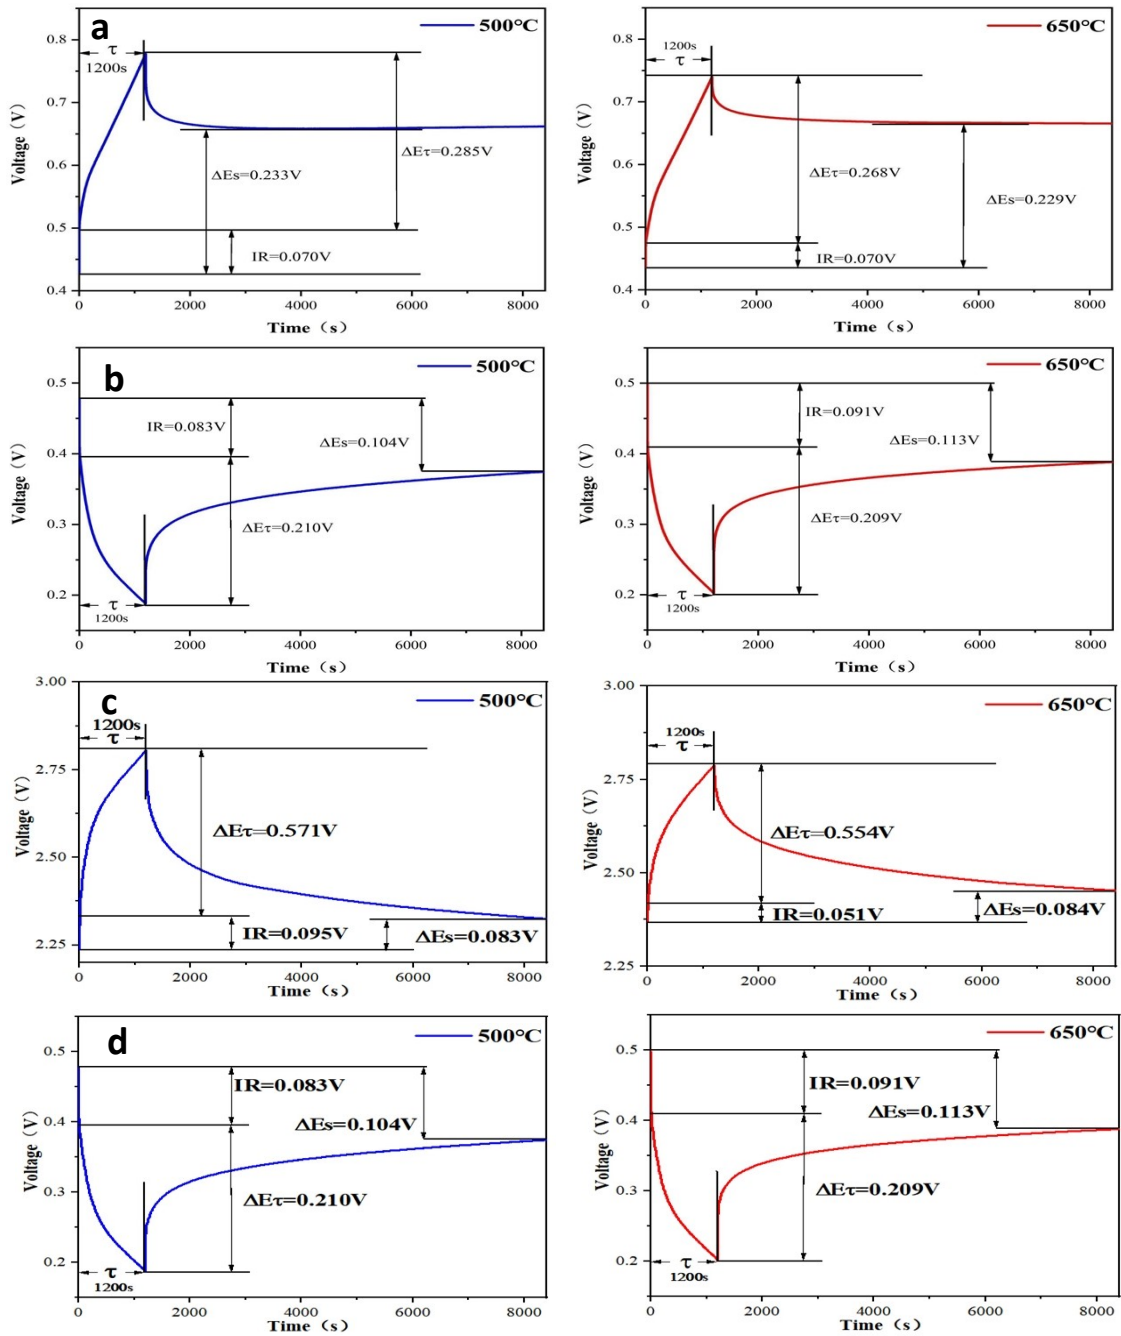

Fig. S4 polarized curves of A-500 and A-650 electrodes at different potentials during the charging-discharging process.

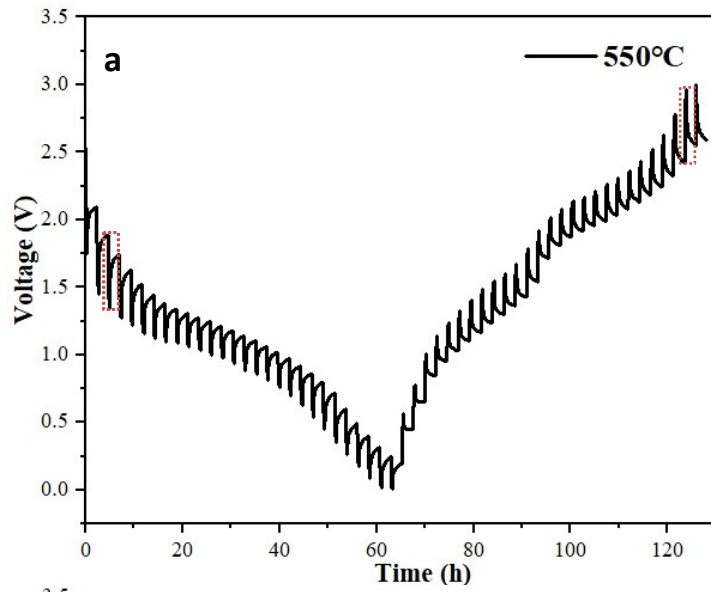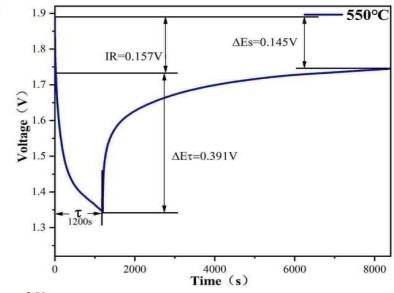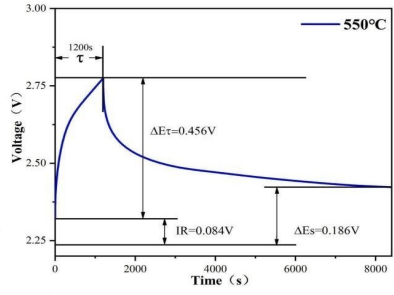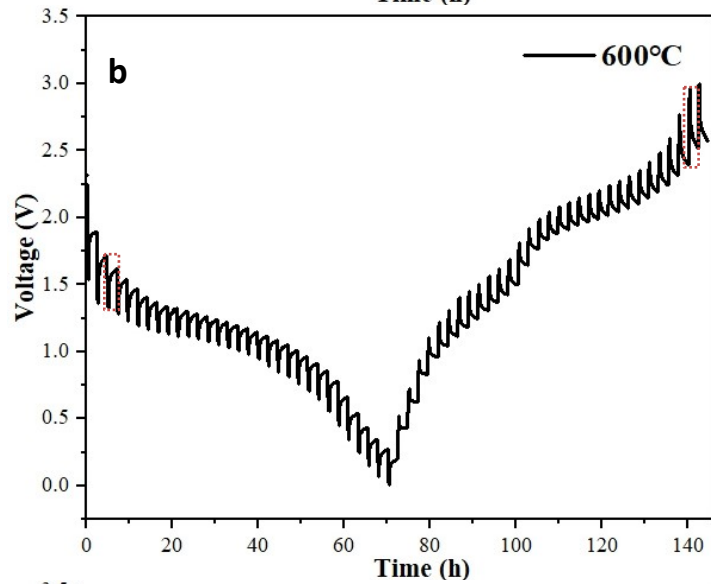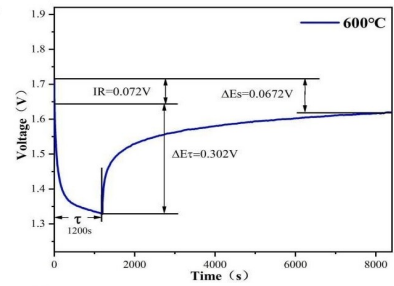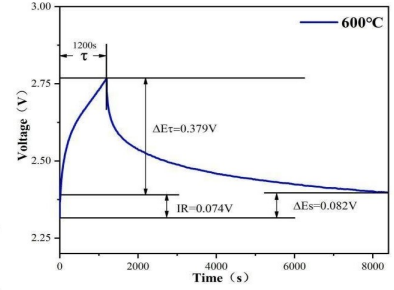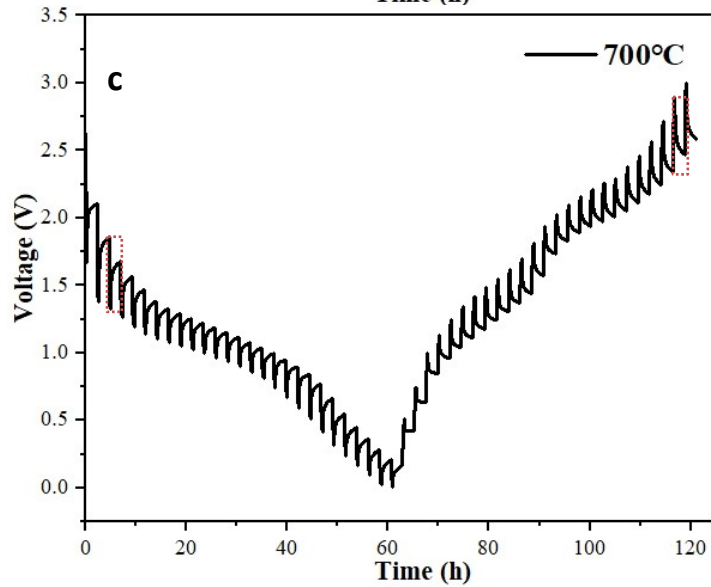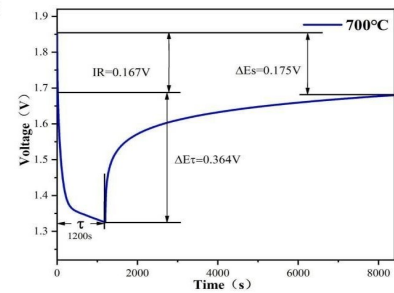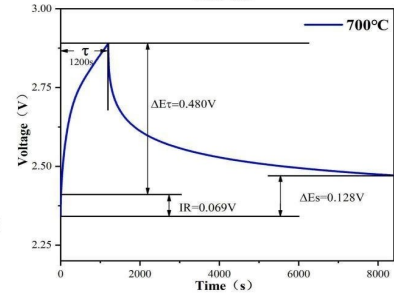

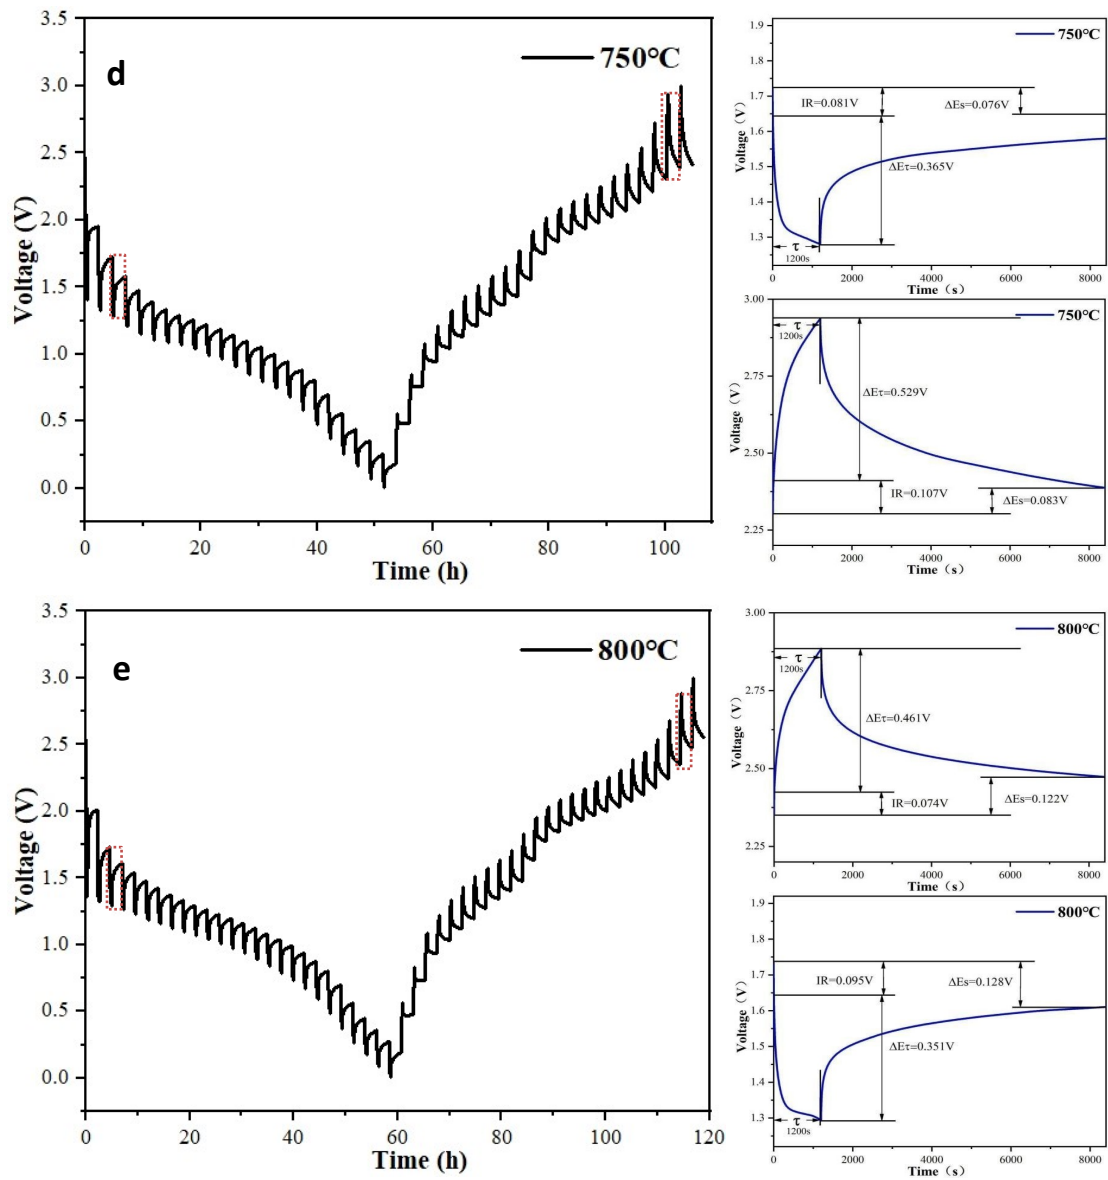

Fig. S5 GITT curves of the nanofiber electrodes: (a) A-550, (b) A-600, (c) A-700, (d) A-750 and (e) A-800.



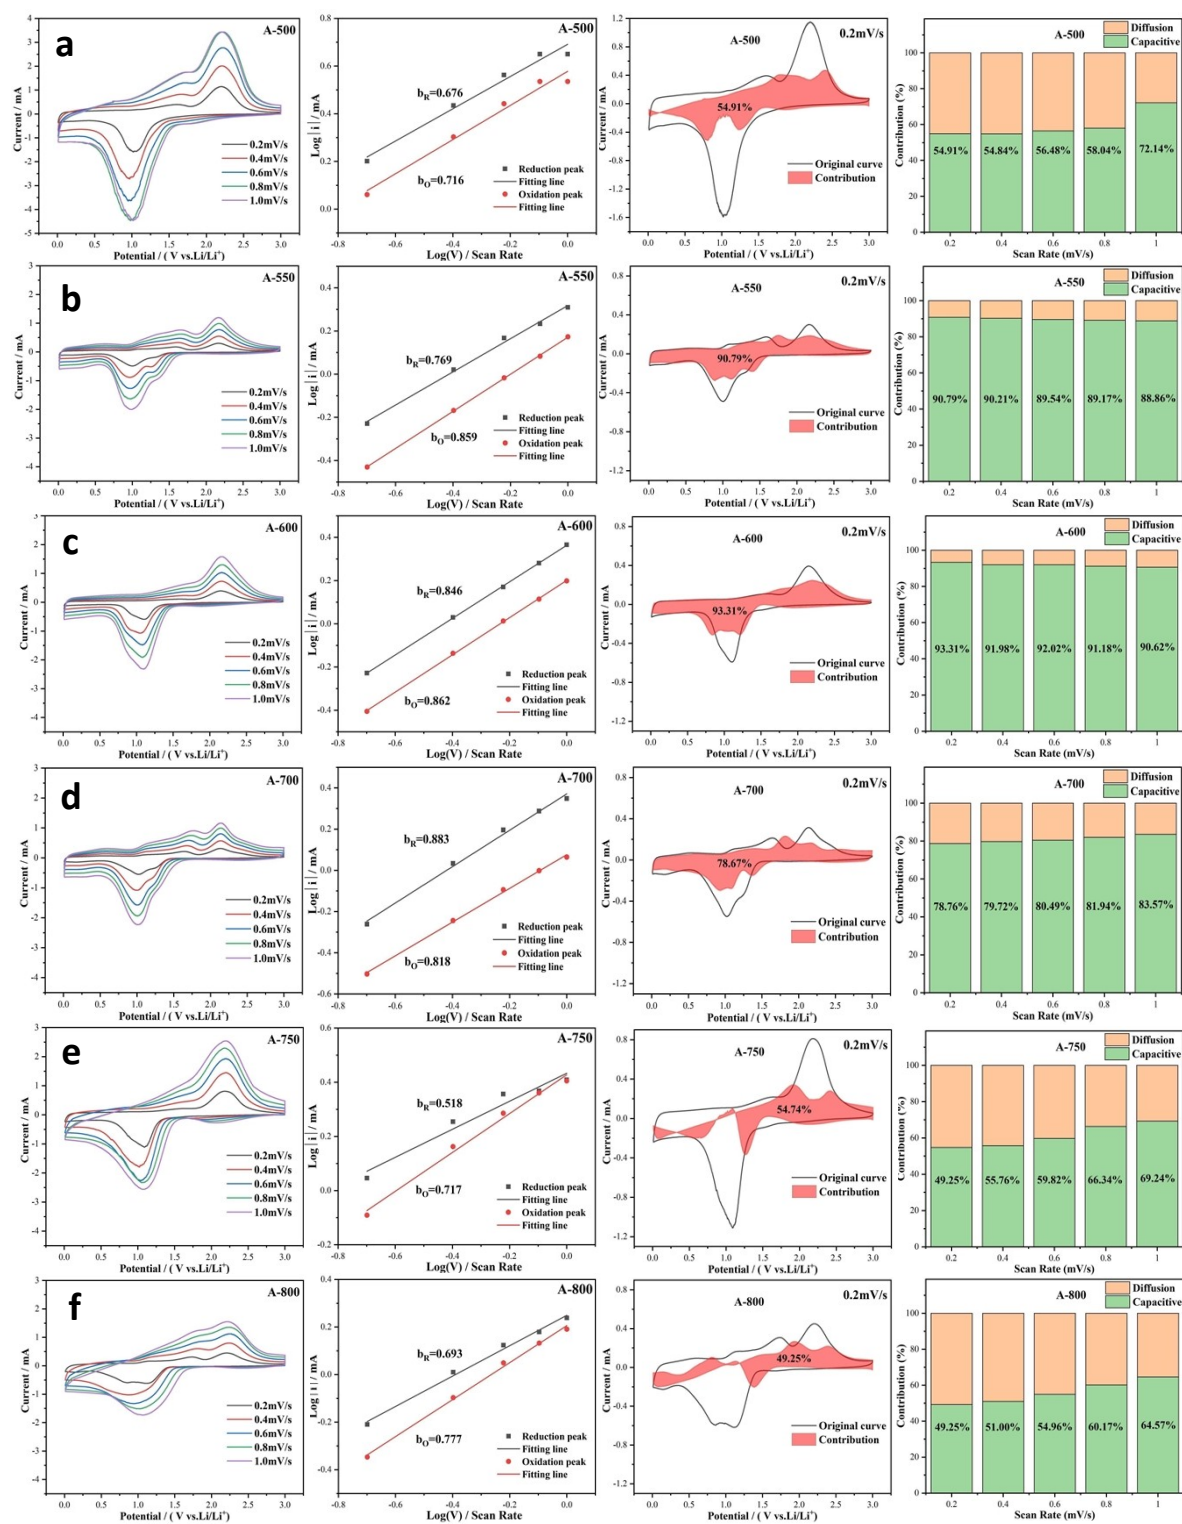

Fig.S6 CV curves and b values of the nanofiber electrodes at different scan rates, pseudocapacitive ratio at a scan rate of 0.2 mV s<sup>-1</sup>, pseudocapacitive contribution at different rates: (a)A-500, (b) A-550, (c) A-600, (d) A-700, (e) A-750 and (f) A-800.



Table S1 Grain sizes of the nanofibers

| Samples       | A-500 | A-550 | A-600 | A-650 | A-700 | A-750 | A-800 |
|---------------|-------|-------|-------|-------|-------|-------|-------|
| Diameter (nm) | 47.8  | 58.9  | 75.6  | 82.6  | 90.3  | 98.3  | 198.5 |

Table S2 Activation period and capacity boost of the electrodes

| Samples | 2th<br>cycle<br>capacity (mAh g <sup>-1</sup> ) | Maximum value of<br>capacity (mAh g <sup>-1</sup> ) | Activation period<br>(number of<br>cycles) | Capacity boost<br>(mAh g <sup>-1</sup> ) | Capacity<br>boost rate (%) |
|---------|-------------------------------------------------|-----------------------------------------------------|--------------------------------------------|------------------------------------------|----------------------------|
| A-500   | 881.6                                           | 1055                                                | 38                                         | 173.4                                    | 19.67%                     |
| A-550   | 805.5                                           |                                                     |                                            |                                          |                            |
| A-600   | 818.8                                           |                                                     |                                            |                                          |                            |
| A-650   | 890.1                                           | 1081.4                                              | 61                                         | 187.6                                    | 21.08%                     |
| A-700   | 882.7                                           | 1009.7                                              | 39                                         | 127                                      | 14.39%                     |
| A-750   | 639.1                                           | 663.9                                               | 26                                         | 24.8                                     | 3.88%                      |
| A-800   | 826.8                                           | 914.2                                               | 16                                         | 87.4                                     | 10.57%                     |

Table S3 Capacity recovery of the electrodes after the current density is returned from 2000 mA g<sup>-1</sup> to 100 mA g<sup>-1</sup> and the capacity increase during the following 10 cycles

| Samples | Cycling capacity at 2000 mA g <sup>-1</sup> current density (mAh g <sup>-1</sup> ) | Capacity returns to 100 mA g <sup>-1</sup> (mAh g <sup>-1</sup> ) | Recovered capacity value (mAh g <sup>-1</sup> ) | Recovered capacity ratio (%) | 10th cycle capacity returns to 100 mA g <sup>-1</sup> (mAh g <sup>-1</sup> ) | 10 cycles of capacity boost after restoring 100mA g <sup>-1</sup> (mAh g <sup>-1</sup> ) | 10 cycles of capacity boost ratio after restoring 100mA g <sup>-1</sup> (%) |
|---------|------------------------------------------------------------------------------------|-------------------------------------------------------------------|-------------------------------------------------|------------------------------|------------------------------------------------------------------------------|------------------------------------------------------------------------------------------|-----------------------------------------------------------------------------|
| A-500   | 470.3                                                                              | 914.2                                                             | 443.9                                           | 94.4                         | 968.1                                                                        | 53.9                                                                                     | 5.9                                                                         |
| A-550   | 622.7                                                                              | 888.9                                                             | 266.2                                           | 42.8                         | 965.3                                                                        | 76.4                                                                                     | 8.6                                                                         |
| A-600   | 745.5                                                                              | 877.5                                                             | 132.0                                           | 17.7                         | 936.8                                                                        | 59.4                                                                                     | 6.8                                                                         |
| A-650   | 556.3                                                                              | 944.2                                                             | 387.9                                           | 69.7                         | 1067.9                                                                       | 123.7                                                                                    | 13.1                                                                        |
| A-700   | 573.6                                                                              | 887.3                                                             | 313.7                                           | 54.7                         | 977.2                                                                        | 89.9                                                                                     | 10.1                                                                        |
| A-750   | 526.3                                                                              | 831.4                                                             | 305.0                                           | 58.0                         | 912.4                                                                        | 81.0                                                                                     | 9.7                                                                         |
| A-800   | 322.8                                                                              | 711.0                                                             | 388.2                                           | 120.3                        | 737.0                                                                        | 26.0                                                                                     | 3.7                                                                         |

Table S4. Performances of the NiCo<sub>2</sub>O<sub>4</sub> based electrodes in this work and previous reports.

| Sample                                                                                                                               | Specific capacity obtained from the cycling test                     | Ref.      |
|--------------------------------------------------------------------------------------------------------------------------------------|----------------------------------------------------------------------|-----------|
| <b>Pristine NiCo<sub>2</sub>O<sub>4</sub></b>                                                                                        |                                                                      |           |
| NiCo <sub>2</sub> O <sub>4</sub> nanofiber with NiO/Co <sub>3</sub> O <sub>4</sub> /NiCo <sub>2</sub> O <sub>4</sub> heterostructure | 1081.4 mAh g <sup>-1</sup> at 100 mA g <sup>-1</sup> after 62 cycles | This work |
| NiCo <sub>2</sub> O <sub>4</sub> flowers                                                                                             | 939 mAh g <sup>-1</sup> at 100 mA g <sup>-1</sup> after 60 cycles    | 1         |
| NiCo <sub>2</sub> O <sub>4</sub> hollow spheres                                                                                      | 706 mAh g <sup>-1</sup> at 200 mA g <sup>-1</sup> after 100 cycles   | 2         |
| NiCo <sub>2</sub> O <sub>4</sub> nanosheets                                                                                          | 805 mAh g <sup>-1</sup> at 200 mA g <sup>-1</sup> after 60 cycles    | 3         |
| NiCo <sub>2</sub> O <sub>4</sub> nanocactus arrays                                                                                   | 520 mAh g <sup>-1</sup> at 120 mA g <sup>-1</sup> after 100 cycles   | 4         |
| NiCo <sub>2</sub> O <sub>4</sub> submicron particle                                                                                  | 384 mAh g <sup>-1</sup> at 60 mA g <sup>-1</sup> after 50 cycles     | 5         |
| NiCo <sub>2</sub> O <sub>4</sub> polyhedra                                                                                           | 1050 mAh g <sup>-1</sup> at 100 mA g <sup>-1</sup> after 60 cycles   | 6         |
| single-crystalline NiCo <sub>2</sub> O <sub>4</sub> nanoribbons                                                                      | 1198 mAh g <sup>-1</sup> at 200 mA g <sup>-1</sup> after 60 cycles   | 7         |
| <b>NiCo<sub>2</sub>O<sub>4</sub> composites</b>                                                                                      |                                                                      |           |
| RGO/NiCo <sub>2</sub> O <sub>4</sub> @carbon nanofibers                                                                              | 1712 mAh g <sup>-1</sup> at 500 mA g <sup>-1</sup> after 300 cycles  | 8         |
| NiCo <sub>2</sub> O <sub>4</sub> @carbon fibers                                                                                      | 639 mAh g <sup>-1</sup> at 200 mA g <sup>-1</sup> after 100 cycles   | 9         |
| NiCo <sub>2</sub> O <sub>4</sub> @carbon nanofiber                                                                                   | 778 mAh g <sup>-1</sup> at 222.5 mA g <sup>-1</sup> after 300 cycles | 10        |
| NiCo <sub>2</sub> O <sub>4</sub> @graphene                                                                                           | 985 mAh g <sup>-1</sup> at 200 mA g <sup>-1</sup> after 60 cycles    | 3         |
| NiCo <sub>2</sub> O <sub>4</sub> @Au nanotubes                                                                                       | 732.5 mAh g <sup>-1</sup> at 100 mA g <sup>-1</sup> after 200 cycles | 11        |
| NiCo <sub>2</sub> O <sub>4</sub> @graphene                                                                                           | 886 mAh g <sup>-1</sup> at 500 mA g <sup>-1</sup> after 450 cycles   | 12        |
| NiO@graphene nanofibers                                                                                                              | 571 mAh g <sup>-1</sup> at 100 mA g <sup>-1</sup> after 50 cycles    | 13        |

Table S5 Comparative analysis of overpotential of A-500 and A-650

| electrodes                       |         |                          |                        |                                       |
|----------------------------------|---------|--------------------------|------------------------|---------------------------------------|
|                                  | samples | $\Delta E\tau(\text{V})$ | $\Delta E_s(\text{V})$ | $\Delta E\tau - \Delta E_s(\text{V})$ |
| The second charging cycle        | A-500   | 0.285                    | 0.233                  | 0.052                                 |
|                                  | A-650   | 0.268                    | 0.229                  | 0.039                                 |
| The last second charging cycle   | A-500   | 0.571                    | 0.083                  | 0.488                                 |
|                                  | A-650   | 0.554                    | 0.084                  | 0.470                                 |
| The third discharging cycle      | A-500   | 0.41                     | 0.148                  | 0.262                                 |
|                                  | A-650   | 0.376                    | 0.158                  | 0.218                                 |
| The last forth discharging cycle | A-500   | 0.210                    | 0.104                  | 0.106                                 |
|                                  | A-650   | 0.209                    | 0.113                  | 0.096                                 |

Table S6 Resistance values of the electrodes

| samples          | A-500 | A-550 | A-600 | A-650 | A-700 | A-750 | A-800 |
|------------------|-------|-------|-------|-------|-------|-------|-------|
| $R_{ct}(\Omega)$ | 690.7 | 530.5 | 495.8 | 270.2 | 509.6 | 598.3 | 803.2 |
| $Z_w(\Omega)$    | 180.2 | 79.4  | 110.4 | 15.6  | 124.9 | 43.3  | 75.1  |

## References

1. L. Li, Y. Cheah, Y. Ko, P. Teh, G. Wee, C. Wong, S. Peng and M. Srinivasan, *Journal of Materials chemistry A*, 2013, **1**, 10935-10941.
2. L. Shen, L. Yu, X.-Y. Yu, X. Zhang and X. W. Lou, *Angewandte Chemie International Edition*, 2015, **54**, 1868-1872.
3. C. Zhang and J.-S. Yu, *Chemistry – A European Journal*, 2016, **22**, 4422-4430.
4. J. Cheng, Y. Lu, K. Qiu, H. Yan, J. Xu, L. Han, X. Liu, J. Luo, J.-K. Kim and Y. Luo, *Scientific Reports*, 2015, **5**, 12099.
5. D. Darbar, M. R. Anilkumar, V. Rajagopalan, I. Bhattacharya, H. I. Elim, T. Ramakrishnappa, F. I. Ezema, R. Jose and M. V. Reddy, *Ceramics International*, 2018, **44**, 4630-4639.
6. Y. Xia and H. Wang, *Ionics*, 2016, **22**, 159-166.
7. B. Li, J. Feng, Y. Qian and S. Xiong, *Journal of Materials Chemistry A*, 2015, **3**, 10336-10344.
8. R. Li, H. Ke, C. Shi, Z. Long, Z. Dai, H. Qiao and K. Wang, *Chemical Engineering Journal*, 2021, **415**, 128874.
9. M. L. Hsiao and C. T. Lo, *International Journal of Energy Research*, 2020, **44**, 8606-8621.
10. J. Zhang, R. Chu, Y. Chen, H. Jiang, Y. Zhang, N. M. Huang and H. Guo, *Nanotechnology*, 2018, **29**, 125401.
11. J. Zhu, Z. Xu and B. Lu, *Nano Energy*, 2014, **7**, 114-123.
12. S. Liu, J. Wu, J. Zhou, G. Fang and S. Liang, *Electrochimica Acta*, 2015, **176**, 1-9.
13. B. Yuan, J. Li, M. Xia, Y. Zhang, R. Lei, P. Zhao and X. Li, *Materials Research Express*, 2020, **7**, 115007.
